# Supplementary material for: Intranasal mRNA-LNP vaccination protects hamsters from SARS-CoV-2 infection
Source: bioRxiv or medRxiv preprint supplement (doi:10.1101/2023.01.11.523616), 2023-01-17

## Supplemental information

**Supplementary Table 1. Statistical comparisons of S-specific serum binding IgG antibody titers after vaccination**

| Comparison                                       | Estimated Fold-change<br>(95% CI) | Adjusted P-value |
|--------------------------------------------------|-----------------------------------|------------------|
| <i>Dose 1 (Day 21)</i>                           |                                   |                  |
| 25- $\mu$ g mRNA-LNP1 over 5- $\mu$ g mRNA-LNP1  | 68.53<br>(25.63-185.69)           | <1e-6            |
| 25- $\mu$ g mRNA-LNP2 over 5- $\mu$ g mRNA-LNP1  | 67.68<br>(25.04-182.43)           | <1e-6            |
| 5- $\mu$ g mRNA-LNP2 over 5- $\mu$ g mRNA-LNP1   | 50.61<br>(22.1-117.24)            | <1e-6            |
| 25- $\mu$ g mRNA-LNP1 over 0.4- $\mu$ g IM       | 3.11<br>(0.86-11.06)              | 0.9619           |
| 25- $\mu$ g mRNA-LNP1 over 1- $\mu$ g IM         | 1.63<br>(0.61-4.38)               | 0.8426           |
| 5- $\mu$ g mRNA-LNP1 over 0.4- $\mu$ g IM        | 0.05<br>(0.02-0.14)               | <1e-6            |
| 5- $\mu$ g mRNA-LNP1 over 1- $\mu$ g IM          | 0.02<br>(0.01-0.05)               | <1e-6            |
| 25- $\mu$ g mRNA-LNP2 over 25- $\mu$ g mRNA-LNP1 | 0.99<br>(0.31-3.14)               | 0.4892           |
| 25- $\mu$ g mRNA-LNP2 over 5- $\mu$ g mRNA-LNP2  | 1.34<br>(0.5-3.71)                | 0.7183           |
| 25- $\mu$ g mRNA-LNP2 over 0.4- $\mu$ g IM       | 3.07<br>(0.9-11.02)               | 0.9635           |
| 25- $\mu$ g mRNA-LNP2 over 1- $\mu$ g IM         | 1.61<br>(0.6-4.4)                 | 0.8312           |
| 5- $\mu$ g mRNA-LNP2 over 25- $\mu$ g mRNA-LNP1  | 0.74<br>(0.27-2.03)               | 0.2668           |
| 5- $\mu$ g mRNA-LNP2 over 0.4- $\mu$ g IM        | 2.3<br>(0.75-6.89)                | 0.9359           |
| 5- $\mu$ g mRNA-LNP2 over 1- $\mu$ g IM          | 1.2<br>(0.54-2.69)                | 0.6883           |
| 1- $\mu$ g IM over 0.4- $\mu$ g IM               | 1.91<br>(0.63-5.83)               | 0.8853           |
| <i>Dose 2 (Day 41)</i>                           |                                   |                  |
| 25- $\mu$ g mRNA-LNP1 over 5- $\mu$ g mRNA-LNP1  | 3.64<br>(1.54-8.55)               | 0.0024           |
| 25- $\mu$ g mRNA-LNP2 over 25- $\mu$ g mRNA-LNP1 | 3.68<br>(1.78-7.55)               | 6e-04            |
| 25- $\mu$ g mRNA-LNP2 over 5- $\mu$ g mRNA-LNP1  | 13.38<br>(5.58-31.97)             | <1e-6            |
| 25- $\mu$ g mRNA-LNP2 over 5- $\mu$ g mRNA-LNP2  | 2.7<br>(1.1-6.61)                 | 0.0156           |
| 5- $\mu$ g mRNA-LNP2 over 5- $\mu$ g mRNA-LNP1   | 4.95<br>(1.8-13.8)                | 0.0023           |
| 25- $\mu$ g mRNA-LNP1 over 0.4- $\mu$ g IM       | 0.61<br>(0.27-1.34)               | 0.1004           |
| 25- $\mu$ g mRNA-LNP1 over 1- $\mu$ g IM         | 0.37<br>(0.17-0.86)               | 0.0138           |
| 5- $\mu$ g mRNA-LNP1 over 0.4- $\mu$ g IM        | 0.17<br>(0.06-0.43)               | 2e-04            |
| 5- $\mu$ g mRNA-LNP1 over 1- $\mu$ g IM          | 0.1<br>(0.04-0.27)                | 2e-04            |

|                                                 |                     |        |
|-------------------------------------------------|---------------------|--------|
| 25- $\mu$ g mRNA-LNP2 over 0.4- $\mu$ g IM      | 2.24<br>(0.99-4.93) | 0.9742 |
| 25- $\mu$ g mRNA-LNP2 over 1- $\mu$ g IM        | 1.38<br>(0.61-3.2)  | 0.7796 |
| 5- $\mu$ g mRNA-LNP2 over 25- $\mu$ g mRNA-LNP1 | 1.36<br>(0.56-3.32) | 0.7592 |
| 5- $\mu$ g mRNA-LNP2 over 0.4- $\mu$ g IM       | 0.83<br>(0.32-2.27) | 0.3406 |
| 5- $\mu$ g mRNA-LNP2 over 1- $\mu$ g IM         | 0.51<br>(0.19-1.38) | 0.0894 |
| 1- $\mu$ g IM over 0.4- $\mu$ g IM              | 1.63<br>(0.63-3.98) | 0.8621 |

---

CI, confidence interval; IgG, immunoglobulin G; IM, intramuscular; LNP, lipid nanoparticle; mRNA, messenger RNA.

**Supplementary Table 2. Statistical comparisons of S-specific serum binding IgA antibody titers after vaccination**

| Comparison                                       | Estimated Fold-change<br>(95% CI) | Adjusted<br>P-value |
|--------------------------------------------------|-----------------------------------|---------------------|
| <i>Dose 1 (Day 21)</i>                           |                                   |                     |
| 25- $\mu$ g mRNA-LNP2 over 25- $\mu$ g mRNA-LNP1 | 83.81<br>(38.04-224.25)           | <1e-6               |
| 25- $\mu$ g mRNA-LNP2 over 5- $\mu$ g mRNA-LNP2  | 32.7<br>(3.92-716.22)             | 0.0035              |
| 25- $\mu$ g mRNA-LNP2 over 0.4- $\mu$ g IM       | 2.84<br>(1.18-6.73)               | 0.0104              |
| 25- $\mu$ g mRNA-LNP1 over 0.4- $\mu$ g IM       | 0.03<br>(0.01-0.09)               | <1e-6               |
| 25- $\mu$ g mRNA-LNP1 over 1- $\mu$ g IM         | 0.02<br>(0.01-0.05)               | <1e-6               |
| 25- $\mu$ g mRNA-LNP2 over 1- $\mu$ g IM         | 1.7<br>(0.72-3.93)                | 0.8993              |
| 5- $\mu$ g mRNA-LNP2 over 25- $\mu$ g mRNA-LNP1  | 2.56<br>(0.12-24.18)              | 0.8043              |
| 5- $\mu$ g mRNA-LNP2 over 0.4- $\mu$ g IM        | 0.09<br>(<1e-6-0.8)               | 0.0171              |
| 5- $\mu$ g mRNA-LNP2 over 1- $\mu$ g IM          | 0.05<br>(<1e-6-0.44)              | 0.0066              |
| 1- $\mu$ g IM over 0.4- $\mu$ g IM               | 1.67<br>(0.67-4.14)               | 0.8746              |
| <i>Dose 2 (Day 41)</i>                           |                                   |                     |
| 25- $\mu$ g mRNA-LNP1 over 5- $\mu$ g mRNA-LNP1  | 3.74<br>(1.37-10.19)              | 0.0051              |
| 25- $\mu$ g mRNA-LNP2 over 25- $\mu$ g mRNA-LNP1 | 5.77<br>(2.57-12.95)              | <1e-6               |
| 25- $\mu$ g mRNA-LNP2 over 5- $\mu$ g mRNA-LNP1  | 21.57<br>(7.93-60.5)              | <1e-6               |
| 25- $\mu$ g mRNA-LNP2 over 5- $\mu$ g mRNA-LNP2  | 4.05<br>(1.37-11.73)              | 0.0066              |
| 5- $\mu$ g mRNA-LNP2 over 5- $\mu$ g mRNA-LNP1   | 5.33<br>(1.55-18.18)              | 0.006               |
| 25- $\mu$ g mRNA-LNP1 over 0.4- $\mu$ g IM       | 0.21<br>(0.08-0.52)               | 0.0025              |
| 25- $\mu$ g mRNA-LNP1 over 1- $\mu$ g IM         | 0.13<br>(0.05-0.33)               | <1e-6               |
| 5- $\mu$ g mRNA-LNP1 over 0.4- $\mu$ g IM        | 0.06<br>(0.02-0.18)               | <1e-6               |
| 5- $\mu$ g mRNA-LNP1 over 1- $\mu$ g IM          | 0.03<br>(0.01-0.1)                | <1e-6               |
| 25- $\mu$ g mRNA-LNP2 over 0.4- $\mu$ g IM       | 1.21<br>(0.47-3.09)               | 0.6658              |
| 25- $\mu$ g mRNA-LNP2 over 1- $\mu$ g IM         | 0.73<br>(0.28-1.88)               | 0.2411              |
| 5- $\mu$ g mRNA-LNP2 over 25- $\mu$ g mRNA-LNP1  | 1.43<br>(0.51-4.12)               | 0.7531              |
| 5- $\mu$ g mRNA-LNP2 over 0.4- $\mu$ g IM        | 0.3<br>(0.09-0.95)                | 0.0219              |
| 5- $\mu$ g mRNA-LNP2 over 1- $\mu$ g IM          | 0.18<br>(0.06-0.57)               | 0.0044              |
| 1- $\mu$ g IM over 0.4- $\mu$ g IM               | 1.67<br>(0.58-4.79)               | 0.8428              |

CI, confidence interval; IgA, immunoglobulin A; IM, intramuscular; LNP, lipid nanoparticle; mRNA, messenger RNA.

**Supplementary Table 3. Statistical comparisons of serum neutralizing antibody titers after vaccination**

| Comparison                                       | Estimated Fold-change<br>(95% CI) | Adjusted P-value |
|--------------------------------------------------|-----------------------------------|------------------|
| <i>Dose 1 (Day 21)</i>                           |                                   |                  |
| 25- $\mu$ g mRNA-LNP2 over 25- $\mu$ g mRNA-LNP1 | 38.84<br>(8.7-287.37)             | <1e-6            |
| 25- $\mu$ g mRNA-LNP2 over 5- $\mu$ g mRNA-LNP2  | 17.46<br>(2.21-275.24)            | 0.0044           |
| 25- $\mu$ g mRNA-LNP2 over 0.4- $\mu$ g IM       | 8.09<br>(1.09-96.32)              | 0.0205           |
| 25- $\mu$ g mRNA-LNP1 over 0.4- $\mu$ g IM       | 0.21<br>(0.02-2.64)               | 0.0801           |
| 25- $\mu$ g mRNA-LNP1 over 1- $\mu$ g IM         | 0.06<br>(0.01-0.21)               | <1e-6            |
| 25- $\mu$ g mRNA-LNP2 over 1- $\mu$ g IM         | 2.16<br>(0.63-7.5)                | 0.8996           |
| 5- $\mu$ g mRNA-LNP2 over 25- $\mu$ g mRNA-LNP1  | 2.22<br>(0.12-24.4)               | 0.7781           |
| 5- $\mu$ g mRNA-LNP2 over 0.4- $\mu$ g IM        | 0.46<br>(0.02-7.72)               | 0.275            |
| 5- $\mu$ g mRNA-LNP2 over 1- $\mu$ g IM          | 0.12<br>(0.01-0.77)               | 0.0149           |
| 1- $\mu$ g IM over 0.4- $\mu$ g IM               | 3.74<br>(0.6-39.29)               | 0.9309           |
| <i>Dose 2 (Day 41)</i>                           |                                   |                  |
| 25- $\mu$ g mRNA-LNP1 over 5- $\mu$ g mRNA-LNP1  | 5.07<br>(1.53-18.22)              | 0.0054           |
| 25- $\mu$ g mRNA-LNP2 over 25- $\mu$ g mRNA-LNP1 | 5.7<br>(2.28-14.07)               | 0.0008           |
| 25- $\mu$ g mRNA-LNP2 over 5- $\mu$ g mRNA-LNP1  | 28.89<br>(8.5-111.28)             | <1e-6            |
| 25- $\mu$ g mRNA-LNP2 over 5- $\mu$ g mRNA-LNP2  | 5.08<br>(1.46-18.06)              | 0.0059           |
| 5- $\mu$ g mRNA-LNP2 over 5- $\mu$ g mRNA-LNP1   | 5.69<br>(1.32-27.13)              | 0.0119           |
| 25- $\mu$ g mRNA-LNP1 over 0.4- $\mu$ g IM       | 0.36<br>(0.14-0.91)               | 0.0173           |
| 25- $\mu$ g mRNA-LNP1 over 1- $\mu$ g IM         | 0.17<br>(0.06-0.45)               | 0.0004           |
| 5- $\mu$ g mRNA-LNP1 over 0.4- $\mu$ g IM        | 0.07<br>(0.02-.024)               | 0.0002           |
| 5- $\mu$ g mRNA-LNP1 over 1- $\mu$ g IM          | 0.03<br>(0.01-0.12)               | <1e-6            |
| 25- $\mu$ g mRNA-LNP2 over 0.4- $\mu$ g IM       | 2.06<br>(0.83-5.26)               | 0.94             |
| 25- $\mu$ g mRNA-LNP2 over 1- $\mu$ g IM         | 0.96<br>(0.33-2.65)               | 0.4737           |
| 5- $\mu$ g mRNA-LNP2 over 25- $\mu$ g mRNA-LNP1  | 1.12<br>(0.32-3.86)               | 0.5776           |
| 5- $\mu$ g mRNA-LNP2 over 0.4- $\mu$ g IM        | 0.41<br>(0.12-1.43)               | 0.0758           |
| 5- $\mu$ g mRNA-LNP2 over 1- $\mu$ g IM          | 0.19<br>(0.05-0.69)               | 0.0065           |
| 1- $\mu$ g IM over 0.4- $\mu$ g IM               | 2.15<br>(0.77-6.24)               | 0.9333           |

CI, confidence interval, IM, intramuscular; LNP, lipid nanoparticle; mRNA, messenger RNA.

**Supplementary Table 4. Statistical comparisons of viral load by plaque assay<sup>a</sup> in the lungs of vaccinated hamsters at 3 days after SARS-CoV-2 challenge**

| Comparison                                       | Fold-change<br>(standard error) | t-ratio | P-value |
|--------------------------------------------------|---------------------------------|---------|---------|
| 0.4- $\mu$ g IM over 1- $\mu$ g IM               | 2.32<br>(1.23)                  | 1.88    | 0.783   |
| 0.4- $\mu$ g IM over 25- $\mu$ g mRNA-LNP1       | 1.15<br>(1.17)                  | 0.98    | 1       |
| 0.4- $\mu$ g IM over 5- $\mu$ g mRNA-LNP1        | -1.91<br>(1.11)                 | -1.72   | 0.881   |
| 0.4- $\mu$ g IM over 25- $\mu$ g mRNA-LNP2       | 2.77<br>(1.05)                  | 2.64    | 0.245   |
| 0.4- $\mu$ g IM over 5- $\mu$ g mRNA-LNP2        | 0.99<br>(0.98)                  | 1.01    | 1       |
| 0.4- $\mu$ g IM over mock                        | -2.60<br>(0.90)                 | -2.88   | 0.148   |
| 1- $\mu$ g IM over 25- $\mu$ g mRNA-LNP1         | 0.01<br>(1.23)                  | 0.01    | 1       |
| 1- $\mu$ g IM over 5- $\mu$ g mRNA-LNP1          | -3.05<br>(1.17)                 | -2.60   | 0.266   |
| 1- $\mu$ g IM over 25- $\mu$ g mRNA-LNP2         | 1.63<br>(1.11)                  | 1.46    | 0.97    |
| 1- $\mu$ g IM over 5- $\mu$ g mRNA-LNP2          | -0.15<br>(1.05)                 | -0.15   | 1       |
| 1- $\mu$ g IM over mock                          | -3.73<br>(0.98)                 | -3.82   | 0.014   |
| 25- $\mu$ g mRNA-LNP1 over 5- $\mu$ g mRNA-LNP1  | -1.88<br>(1.23)                 | -1.53   | 0.955   |
| 25- $\mu$ g mRNA-LNP1 over 25- $\mu$ g mRNA-LNP2 | 2.79<br>(1.17)                  | 2.39    | 0.401   |
| 25- $\mu$ g mRNA-LNP1 over 5- $\mu$ g mRNA-LNP2  | 1.02<br>(1.11)                  | 0.91    | 1       |
| 25- $\mu$ g mRNA-LNP1 over mock                  | -2.57<br>(1.05)                 | -2.45   | 0.354   |
| 5- $\mu$ g mRNA-LNP1 over 25- $\mu$ g mRNA-LNP2  | 5.85<br>(1.23)                  | 4.76    | 0.001   |
| 5- $\mu$ g mRNA-LNP1 over 5- $\mu$ g mRNA-LNP2   | 4.07<br>(1.17)                  | 3.48    | 0.035   |
| 5- $\mu$ g mRNA-LNP1 over mock                   | 0.49<br>(1.11)                  | 0.44    | 1       |
| 25- $\mu$ g mRNA-LNP2 over 5- $\mu$ g mRNA-LNP2  | -0.60<br>(1.23)                 | -0.49   | 1       |
| 25- $\mu$ g mRNA-LNP2 over mock                  | -4.18<br>(1.17)                 | -3.57   | 0.027   |
| 5- $\mu$ g mRNA-LNP2 over mock                   | -2.40<br>(1.23)                 | -1.96   | 0.731   |

<sup>a</sup>Viral loads ( $\log_{10}$  transformed) were assessed by ordinary linear regression; only modeled data at Day 3 after challenge was evaluated since viral loads on Day 14 were zero for all hamsters. A degree of freedom of 28 was used.

IM, intramuscular; LNP, lipid nanoparticle; mRNA, messenger RNA.

**Supplementary Table 5. Statistical comparisons of viral load by plaque assay in the nasal turbinates of vaccinated hamsters at 3 days after SARS-CoV-2 challenge**

| Comparison                                       | Fold-change<br>(standard error) | <i>t</i> -ratio | P-value |
|--------------------------------------------------|---------------------------------|-----------------|---------|
| 0.4- $\mu$ g IM over 1- $\mu$ g IM               | 3.09<br>(0.87)                  | 3.56            | 0.028   |
| 0.4- $\mu$ g IM over 25- $\mu$ g mRNA-LNP1       | 0.55<br>(0.83)                  | 0.67            | 1       |
| 0.4- $\mu$ g IM over 5- $\mu$ g mRNA-LNP1        | -0.97<br>(0.78)                 | -1.24           | 0.995   |
| 0.4- $\mu$ g IM over 25- $\mu$ g mRNA-LNP2       | 2.59<br>(0.74)                  | 3.52            | 0.031   |
| 0.4- $\mu$ g IM over 5- $\mu$ g mRNA-LNP2        | 1.30<br>(0.69)                  | 1.89            | 0.779   |
| 0.4- $\mu$ g IM over mock                        | -2.02<br>(0.64)                 | -3.18           | 0.073   |
| 1- $\mu$ g IM over 25- $\mu$ g mRNA-LNP1         | -1.53<br>(0.87)                 | -1.76           | 0.86    |
| 1- $\mu$ g IM over 5- $\mu$ g mRNA-LNP1          | -3.05<br>(0.83)                 | -3.69           | 0.02    |
| 1- $\mu$ g IM over 25- $\mu$ g mRNA-LNP2         | 0.52<br>(0.78)                  | 0.66            | 1       |
| 1- $\mu$ g IM over 5- $\mu$ g mRNA-LNP2          | -0.78<br>(0.74)                 | -1.05           | 0.999   |
| 1- $\mu$ g IM over mock                          | -4.09<br>(0.69)                 | -5.95           | 0       |
| 25- $\mu$ g mRNA-LNP1 over 5- $\mu$ g mRNA-LNP1  | -0.51<br>(0.87)                 | -0.59           | 1       |
| 25- $\mu$ g mRNA-LNP1 over 25- $\mu$ g mRNA-LNP2 | 3.06<br>(0.83)                  | 3.70            | 0.019   |
| 25- $\mu$ g mRNA-LNP1 over 5- $\mu$ g mRNA-LNP2  | 1.76<br>(0.78)                  | 2.25            | 0.5     |
| 25- $\mu$ g mRNA-LNP1 over mock                  | -1.56<br>(0.74)                 | -2.11           | 0.607   |
| 5- $\mu$ g mRNA-LNP1 over 25- $\mu$ g mRNA-LNP2  | 4.58<br>(0.87)                  | 5.29            | 0       |
| 5- $\mu$ g mRNA-LNP1 over 5- $\mu$ g mRNA-LNP2   | 3.28<br>(0.83)                  | 3.98            | 0.009   |
| 5- $\mu$ g mRNA-LNP1 over mock                   | -0.03<br>(0.78)                 | -0.04           | 1       |
| 25- $\mu$ g mRNA-LNP2 over 5- $\mu$ g mRNA-LNP2  | -0.28<br>(0.87)                 | -0.33           | 1       |
| 25- $\mu$ g mRNA-LNP2 over mock                  | -3.60<br>(0.83)                 | -4.36           | 0.003   |
| 5- $\mu$ g mRNA-LNP2 over mock                   | -2.31<br>(0.87)                 | -2.66           | 0.236   |

<sup>a</sup>Viral loads ( $\log_{10}$  transformed) were assessed by ordinary linear regression; only modeled data at Day 3 after challenge was evaluated since viral loads on Day 14 were zero for all hamsters. A degree of freedom of 28 was used.

IM, intramuscular; LNP, lipid nanoparticle; mRNA, messenger RNA.

**Supplementary Table 6. Major pulmonary histopathological findings and severity scores after SARS-CoV-2 challenge by vaccine group.**

| <b>Day 3 (After Challenge)</b>               |                   |                                  |                                   |                                  |                                   |                   |                 |
|----------------------------------------------|-------------------|----------------------------------|-----------------------------------|----------------------------------|-----------------------------------|-------------------|-----------------|
|                                              | <b>Intranasal</b> |                                  |                                   |                                  | <b>Intramuscular</b>              |                   |                 |
|                                              | Mock<br>(n = 5)   | mRNA-<br>LNP1<br>5 µg<br>(n = 5) | mRNA-<br>LNP1<br>25 µg<br>(n = 5) | mRNA-<br>LNP2<br>5 µg<br>(n = 5) | mRNA-<br>LNP2<br>25 µg<br>(n = 5) | 0.4 µg<br>(n = 5) | 1 µg<br>(n = 5) |
| <b>Interstitial inflammation, n</b>          |                   |                                  |                                   |                                  |                                   |                   |                 |
| Group total                                  | 5                 | 5                                | 5                                 | 5                                | 5                                 | 5                 | 5               |
| 2 (mild)                                     | 2                 | 4                                | 2                                 | 2                                | 1                                 | 5                 | 2               |
| 3 (moderate)                                 | 3                 | 1                                | 3                                 | 3                                | 4                                 | 0                 | 3               |
| <b>Bronchial/bronchiolar inflammation, n</b> |                   |                                  |                                   |                                  |                                   |                   |                 |
| Group total                                  | 4                 | 5                                | 1                                 | 3                                | 1                                 | 3                 | 4               |
| 1 (minimal)                                  | 2                 | 1                                | 1                                 | 1                                | 0                                 | 2                 | 3               |
| 2 (mild)                                     | 0                 | 3                                | 0                                 | 2                                | 1                                 | 1                 | 1               |
| 3 (moderate)                                 | 2                 | 1                                | 0                                 | 0                                | 0                                 | 0                 | 0               |
| <b>Vascular inflammation, n</b>              |                   |                                  |                                   |                                  |                                   |                   |                 |
| Group total                                  | 4                 | 3                                | 2                                 | 3                                | 2                                 | 4                 | 1               |
| 1 (minimal)                                  | 0                 | 1                                | 1                                 | 1                                | 1                                 | 3                 | 0               |
| 2 (mild)                                     | 2                 | 2                                | 1                                 | 1                                | 0                                 | 1                 | 1               |
| 3 (moderate)                                 | 2                 | 0                                | 0                                 | 1                                | 1                                 | 0                 | 0               |
| <b>Day 14 (After Challenge)</b>              |                   |                                  |                                   |                                  |                                   |                   |                 |
|                                              | <b>Intranasal</b> |                                  |                                   |                                  | <b>Intramuscular</b>              |                   |                 |
|                                              | Mock<br>(n = 5)   | mRNA-<br>LNP1<br>5 µg<br>(n = 5) | mRNA-<br>LNP1<br>25 µg<br>(n = 5) | mRNA-<br>LNP2<br>5 µg<br>(n = 4) | mRNA-<br>LNP2<br>25 µg<br>(n = 4) | 0.4 µg<br>(n = 5) | 1 µg<br>(n = 5) |
| <b>Interstitial inflammation, n</b>          |                   |                                  |                                   |                                  |                                   |                   |                 |
| Group total                                  | 5                 | 5                                | 5                                 | 4                                | 4                                 | 5                 | 5               |
| 2 (mild)                                     | 0                 | 5                                | 4                                 | 0                                | 4                                 | 4                 | 3               |
| 3 (moderate)                                 | 5                 | 0                                | 1                                 | 4                                | 0                                 | 1                 | 2               |
| <b>Type II pneumocyte hyperplasia, n</b>     |                   |                                  |                                   |                                  |                                   |                   |                 |
| Group total                                  | 5                 | 4                                | 5                                 | 4                                | 2                                 | 1                 | 5               |
| 1 (minimal)                                  | 0                 | 3                                | 3                                 | 1                                | 2                                 | 0                 | 0               |
| 2 (mild)                                     | 4                 | 1                                | 1                                 | 2                                | 0                                 | 0                 | 3               |
| 3 (moderate)                                 | 1                 | 0                                | 1                                 | 1                                | 0                                 | 1                 | 2               |
| <b>Bronchial/bronchiolar inflammation, n</b> |                   |                                  |                                   |                                  |                                   |                   |                 |
| Group total                                  | 4                 | 3                                | 2                                 | 3                                | 1                                 | 1                 | 3               |
| 1 (minimal)                                  | 2                 | 3                                | 2                                 | 1                                | 1                                 | 1                 | 3               |
| 2 (mild)                                     | 2                 | 0                                | 0                                 | 2                                | 0                                 | 0                 | 0               |
| <b>Vascular inflammation, n</b>              |                   |                                  |                                   |                                  |                                   |                   |                 |
| Group total                                  | 1                 | 4                                | 4                                 | 4                                | 1                                 | 5                 | 3               |
| 1 (minimal)                                  | 1                 | 4                                | 4                                 | 4                                | 1                                 | 5                 | 3               |

IM, intramuscular; LNP, lipid nanoparticle; mRNA, messenger RNA; SARS-CoV-2, severe acute respiratory syndrome coronavirus 2.

**Supplementary Table 7. Summary of hamsters positive for SARS-CoV-2 N-protein at 3 days after challenge**

| <b>Vaccine Group</b> | <b>Administration Route</b> | <b>Ratio of N-protein Positive Hamsters to Total Population (n/N)</b> |
|----------------------|-----------------------------|-----------------------------------------------------------------------|
| Mock                 | IN                          | 5/5                                                                   |
| mRNA-LNP1 5 µg       | IN                          | 5/5                                                                   |
| mRNA-LNP1 25 µg      | IN                          | 2/5                                                                   |
| mRNA-LNP2 5 µg       | IN                          | 4/5                                                                   |
| mRNA-LNP2 25 µg      | IN                          | 4/5                                                                   |
| Intramuscular 0.4 µg | IM                          | 3/5                                                                   |
| Intramuscular 1 µg   | IM                          | 2/5                                                                   |

IN, intranasal; IM, intramuscular; LNP, lipid nanoparticle; mRNA, messenger RNA; N protein, nucleocapsid protein; SARS-CoV-2, severe acute respiratory syndrome coronavirus 2.



**Supplementary Figure 1. Viral load as determined via qRT-PCR through 14 days after SARS-CoV-2 challenge in vaccinated hamsters.**

Viral load (sgRNA copies per gram of tissue) at 3 days and 14 days after SARS-CoV-2 challenge in (a) lungs and (b) nasal turbinates of vaccinated hamsters. Animal-level data are shown as dots (n = 5 animals per group), with the grey lines representing the geometric mean of each group. LLOD = 10<sup>3</sup> copies/g of tissue.

IM, intramuscular; IN, intranasal; LNP, lipid nanoparticle; mRNA, messenger RNA; qRT-PCR, quantitative reverse transcription polymerase chain reaction; SARS-CoV-2, severe acute respiratory syndrome coronavirus 2; sgRNA, subgenomic RNA.

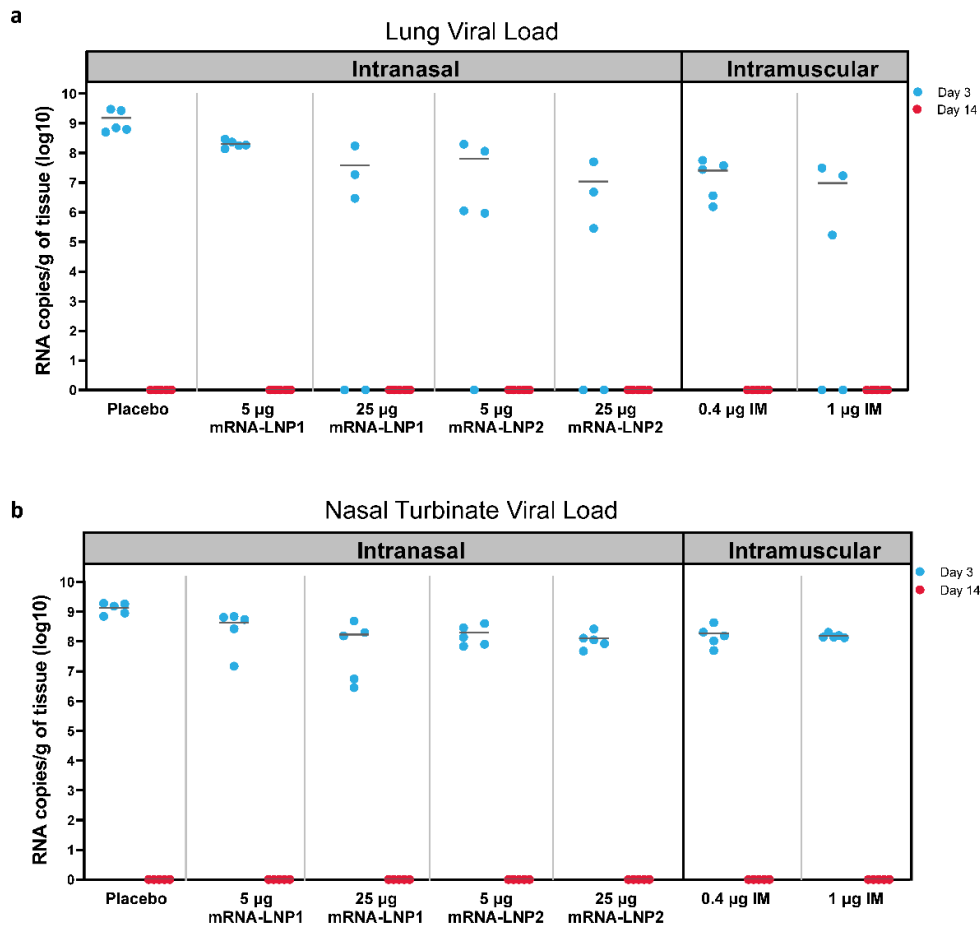

**Supplementary Figure 2. Pulmonary pathology characteristics at 14 days after SARS-CoV-2 challenge in vaccinated hamsters.**

Lung sections from hamsters at 14 days after SARS-CoV-2 challenge were stained with H&E. Representative images of (a) interstitial inflammation, (b) type II pneumocyte hyperplasia (arrows), or (c) airways and blood vessels are shown for hamsters intranasally administered 2 doses of tris/sucrose buffer (mock-vaccinated), mRNA-LNP1 (25  $\mu$ g), mRNA-LNP2 (25  $\mu$ g), or were intramuscularly vaccinated with 2 doses of vaccine (1.0  $\mu$ g). Scale bars = 100  $\mu$ m.

H&E, hematoxylin and eosin; IN, intranasal; SARS-CoV-2, severe acute respiratory syndrome coronavirus 2.

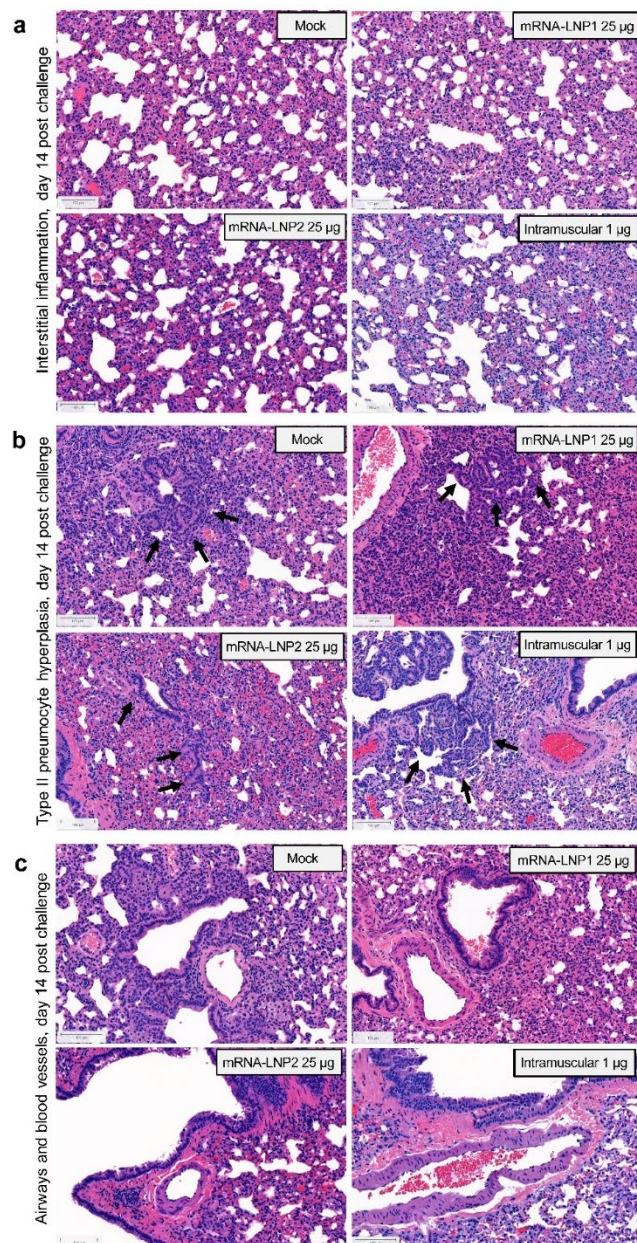

Supplement: Supplementary file [file media-1.pdf]
